# Supplementary material for: Differential DARC/ACKR1 expression distinguishes venular from non-venular endothelial cells in murine tissues
Source: PubMed Central journal article supplement (PMC5438556; doi:10.1186/s12915-017-0381-7), 2017-05-19

# Supplemental Figure 1: Generation of the monoclonal anti-mouse DARC antibody

**A**

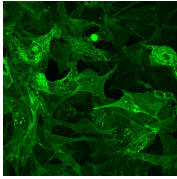

**B**

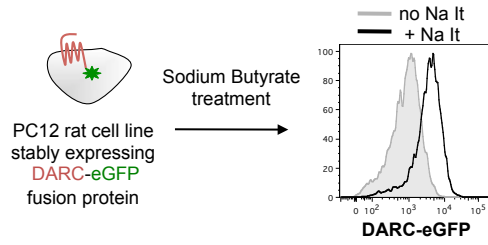

**C**

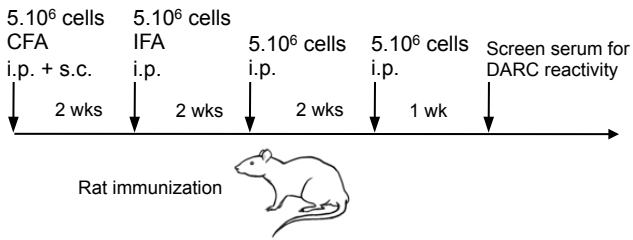

**D**

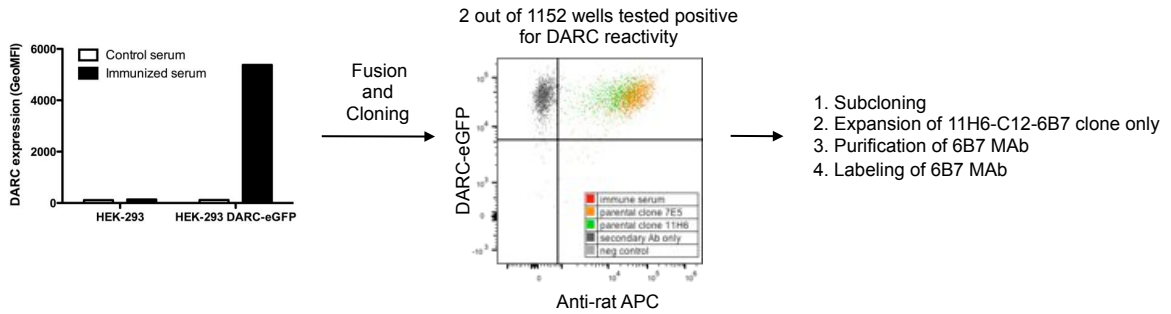

Supplement: 12915_2017_381_MOESM1_ESM.pdf [file 12915_2017_381_MOESM1_ESM.pdf]
