# Supplementary material for: Differential DARC/ACKR1 expression distinguishes venular from non-venular endothelial cells in murine tissues
Source: PubMed Central journal article supplement (PMC5438556; doi:10.1186/s12915-017-0381-7), 2017-05-19
Supplement: 12915_2017_381_MOESM4_ESM.pdf [file 12915_2017_381_MOESM4_ESM.pdf]

Supplemental Figure 3: Quantification of DARC expression on blood microvasculature

CD31 DARC

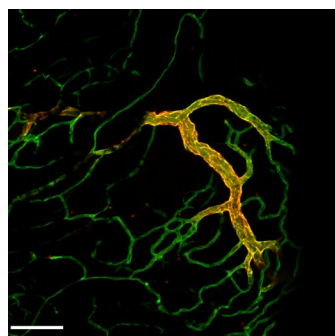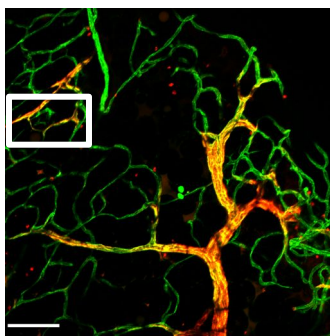

Positive pre-ven. cap.

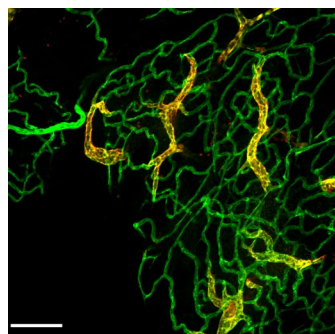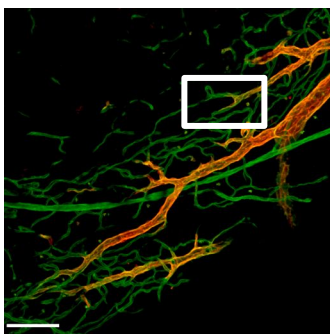

Partial pre-ven. cap.

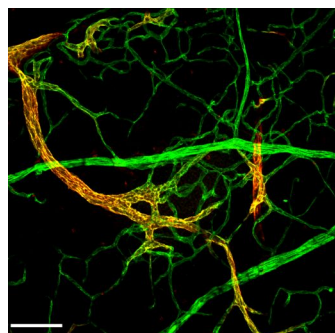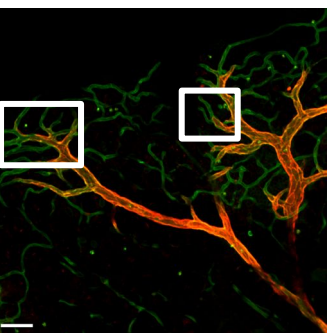

Negative pre-ven. cap.

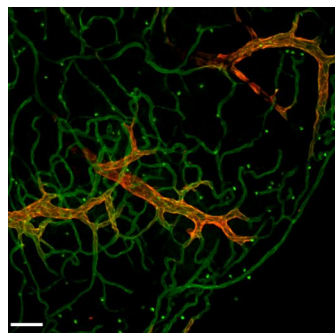

Partial post-cap. ven.
