# Supplementary material for: Differential DARC/ACKR1 expression distinguishes venular from non-venular endothelial cells in murine tissues
Source: PubMed Central journal article supplement (PMC5438556; doi:10.1186/s12915-017-0381-7), 2017-05-19

Supplemental Figure 7: DARC expression in whole mount adipose tissue

CD31 DARC

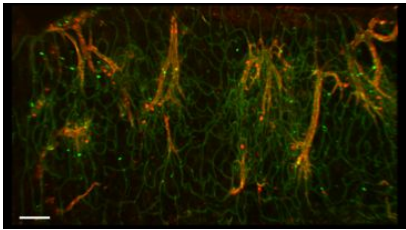

Surface area for CD31

3161698.05  $\mu\text{m}^2$

Surface area for DARC

464211.96  $\mu\text{m}^2$

Merge of surface areas

14.68% overlap

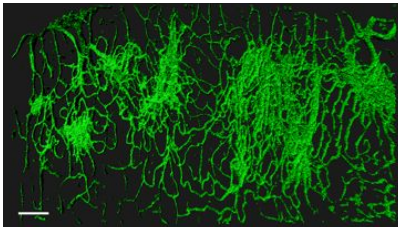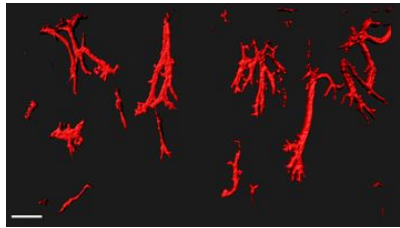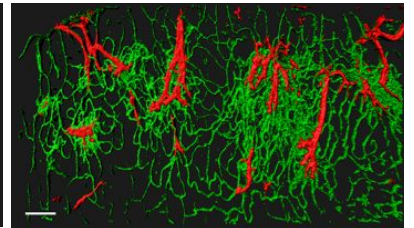

CD31 DARC

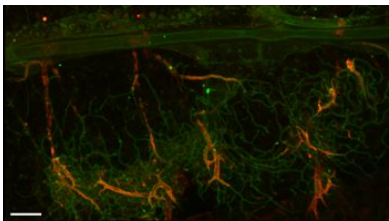

Surface area for CD31

2187833.23  $\mu\text{m}^2$

Surface area for DARC

301388.47  $\mu\text{m}^2$

Merge of surface areas

13.78% overlap

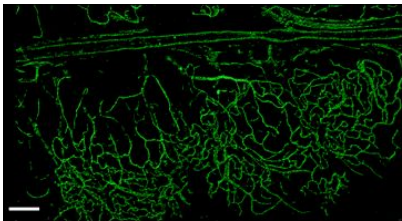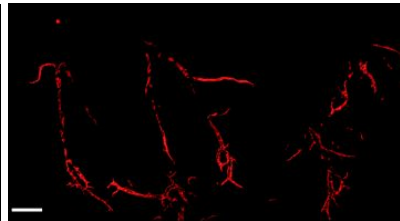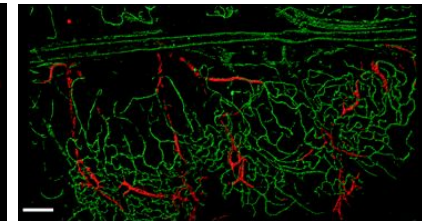

Supplement: 12915_2017_381_MOESM8_ESM.pdf [file 12915_2017_381_MOESM8_ESM.pdf]
