# Supplementary material for: Differential DARC/ACKR1 expression distinguishes venular from non-venular endothelial cells in murine tissues
Source: PubMed Central journal article supplement (PMC5438556; doi:10.1186/s12915-017-0381-7), 2017-05-19

**Supplemental Figure 8: DARC expression on lymphatic endothelial cells**

**A** LECs gated on CD45<sup>-</sup>CD31<sup>+</sup>gp38<sup>+</sup>

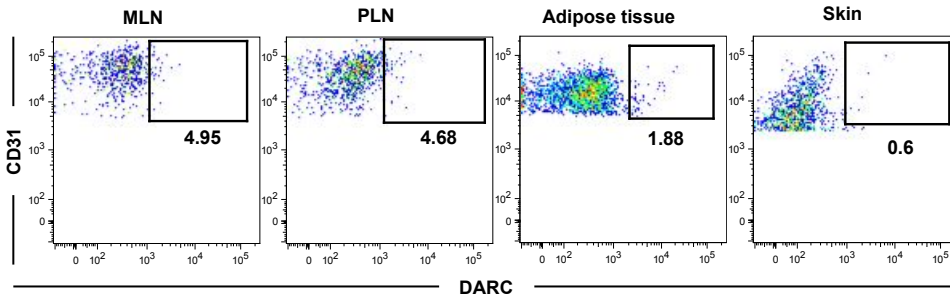

**B**

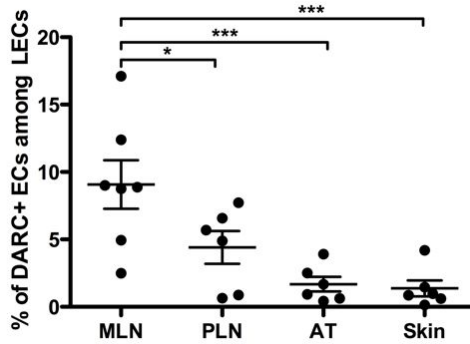

**C**

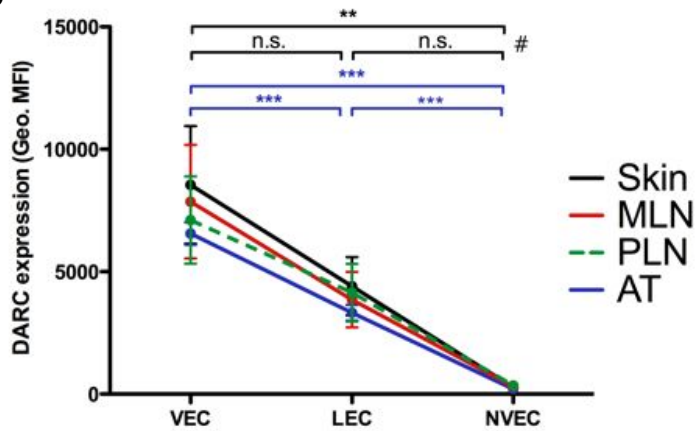

Supplement: 12915_2017_381_MOESM9_ESM.pdf [file 12915_2017_381_MOESM9_ESM.pdf]
